# Supplementary material for: SNHG25 facilitates SNORA50C accumulation to stabilize HDAC1 in neuroblastoma cells
Source: PubMed Central journal article supplement (PMC9276775; doi:10.1038/s41419-022-05040-z), 2022-07-11
Supplement: 41419_2022_5040_MOESM6_ESM.pdf [file 41419_2022_5040_MOESM6_ESM.pdf]

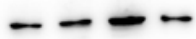

5F HEK-293T NAF1

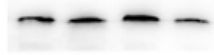

5F HEK-293T NOP10

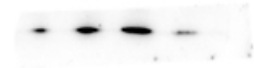

5F HEK-293T NHP2

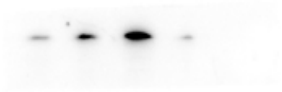

5F HEK-293T GAR1

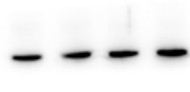

5F HEK-293T DKC1

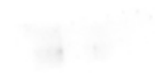

5G SK-N-AS  
DKC1-IP GAPDH

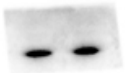

5G SK-N-AS  
Input NAF1

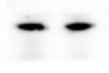

5G SK-N-AS  
Input GAR1

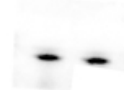

5G SK-N-AS  
Input DKC1

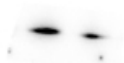

5G SK-N-AS  
DKC1-IP NOP10

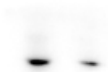

5G SK-N-AS  
DKC1-IP NHP2

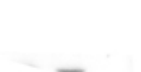

5G SK-N-AS DKC1-IP GAR1

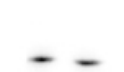

5G SK-N-AS  
DKC1-IP DKC1

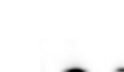

5G SK-N-AS  
DKC1-IP NAF1

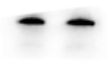

5G SK-N-SH  
Input NOP10

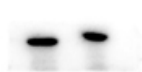

5G SK-N-SH Input NHP2

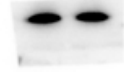

5G SK-N-SH Input GAPDH

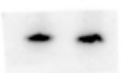

5G SK-N-SH Input GAR1

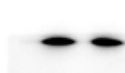

5G SK-N-SH Input NAF1

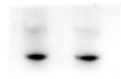

5G SK-N-SH  
Input DKC1

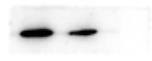

G SK-N-SH  
DKC1-IP NOP10

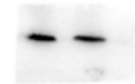

5G SK-N-SH  
DKC1-IP NHP2

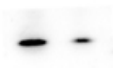

5G SK-N-SH  
DKC1-IP NAF1

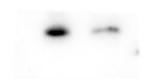

5G SK-N-SH  
DKC1-IP GAR1

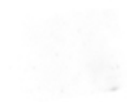

5G SK-N-SH  
DKC1-IP GAPDH

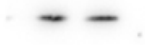

5G SK-N-SH  
DKC1-IP DKC1

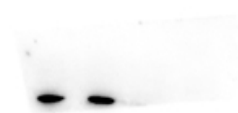

5G SK-N-AS  
Input NOP10

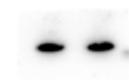

5G SK-N-AS  
Input NHP2

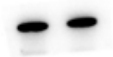

5G SK-N-AS Input GAPDH

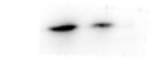

6B SK-N-SH  
HDAC1

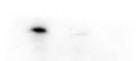

6B SK-N-SH  
GAPDH

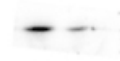

6B SK-N-AS  
HDAC1

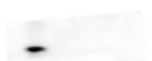

6B SK-N-AS  
GAPDH

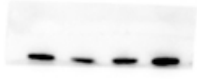

6D SK-N-AS  
HDAC1

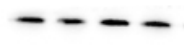

6D SK-N-AS  
GAPDH

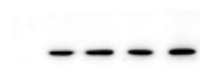

6D SK-N-SH  
GAPDH

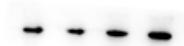

6D SK-N-SH  
HDAC1

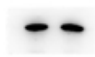

6E SK-N-SH\_CHX  
GAPDH

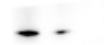

6E SK-N-AS\_CHX  
HDAC1

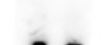

6E SK-N-AS\_CHX  
GAPDH

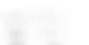

6E SK-N-SH  
CHX HDAC1

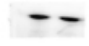

6F SK-N-SH\_MG132  
HDAC1

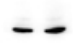

6F SK-N-AS\_MG132  
HDAC1

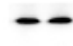

6F SK-N-AS\_MG132  
GAPDH

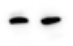

6F SK-N-SH  
MG132 GAPDH

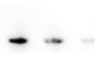

6G SNORA50C ASO#1  
HDAC1

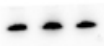

6G SNORA50C ASO#1  
GAPDH

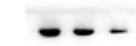

6G Ctrl ASO HDAC1

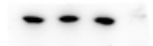

6G Ctrl ASO  
GAPDH

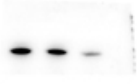

6H Ctrl ASO  
HDAC1

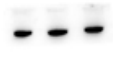

6H Ctrl ASO  
GAPDH

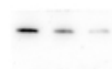

6H SNORA50C  
ASO#1 HDAC1

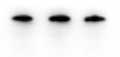

6H SNORA50C  
ASO#1 GAPDH

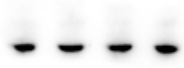

6I SK-N-SH  
GAPDH

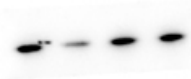

6I SK-N-SH  
HDAC1

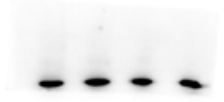

6I SK-N-AS  
GAPDH

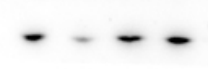

6I SK-N-AS  
IB\_ HDAC1

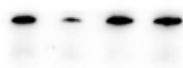

6I SK-N-AS  
HDAC1

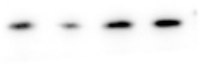

6I SK-N-SH  
IB\_ HDAC1

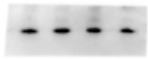

7F GAPDH

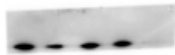

7F HDAC1

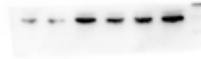

S2I DKC1

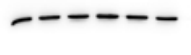

S2I GAPDH

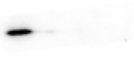

S2E GAPDH

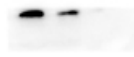

S2E DKC1

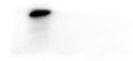

S2E XRN2

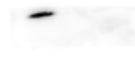

S2E LARP7

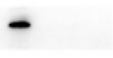

S2F SK-N-AS  
GAPDH

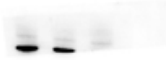

S2F SK-N-AS  
DKC1

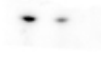

S2F SK-N-SH  
DKC1

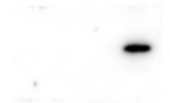

S2F SK-N-SH  
GAPDH

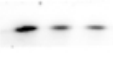

S2J SK-N-SH  
DKC1

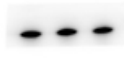

S2J SK-N-AS  
GAPDH

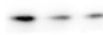

S2J SK-N-AS  
DKC1

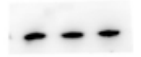

S2J SK-N-SH  
GAPDH

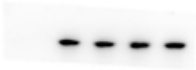

S2M SK-N-SH  
GAPDH

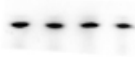

S2M SK-N-SH  
DKC1

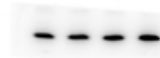

S2M SK-N-AS  
GAPDH

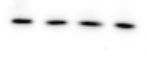

S2M SK-N-AS  
DKC1

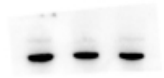

S3C SK-N-SH  
GAPDH

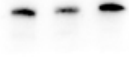

S3C SK-N-AS  
HDAC1

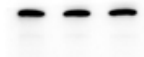

S3C SK-N-AS  
GAPDH

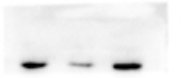

S3C SK-N-SH  
HDAC1

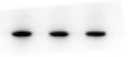

S3D SK-N-SH  
sh-NC GAPDH

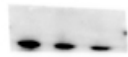

S3D SK-N-SH  
sh-NC HDAC1

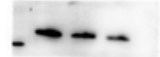

S3D SK-N-AS  
sh-NC HDAC1

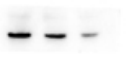

S3D SK-N-AS  
sh-SNHG25#1  
HDAC1

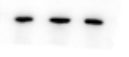

S3D SK-N-AS  
sh-SNHG25#1  
GAPDH

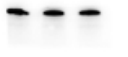

S3D SK-N-AS  
sh-NC GAPDH

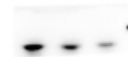

S3D SK-N-SH  
sh-SNHG25#1  
HDAC1

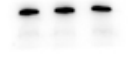

S3D SK-N-SH  
sh-SNHG25#1  
GAPDH

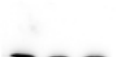

S3E SK-N-AS  
HDAC1

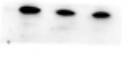

S3E SK-N-AS  
GAPDH

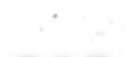

S3E SK-N-SH  
HDAC1

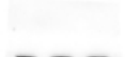

S3E SK-N-SH  
GAPDH
